# Supplementary material for: Gene co-expression network analysis identifies porcine genes associated with variation in Salmonella shedding
Source: PubMed Central journal article supplement (PMC4070558; doi:10.1186/1471-2164-15-452), 2014-06-09

# FOLR1

Microarray

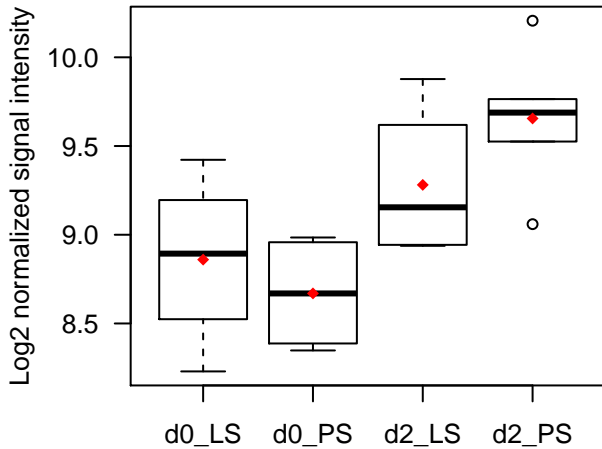

RNA-Seq

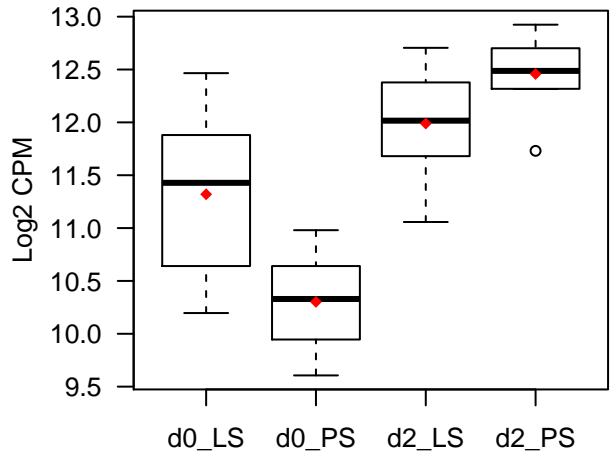

# SLC26A6

Microarray

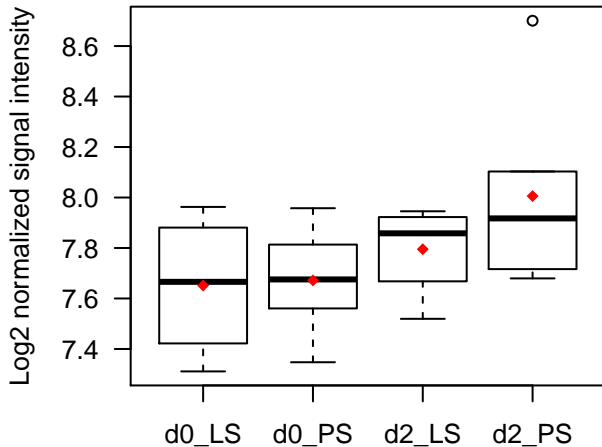

RNA-Seq

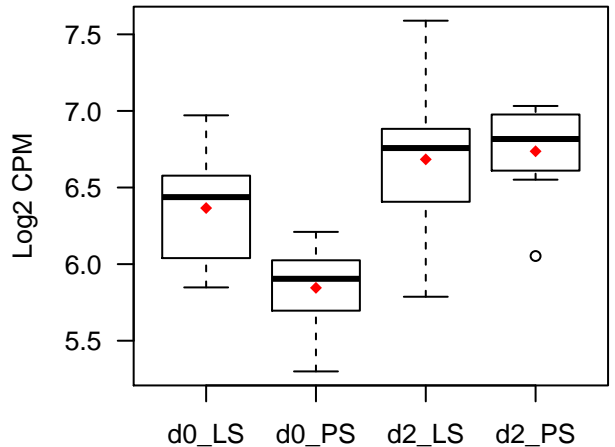

# CDA

Microarray

Log2 normalized signal intensity

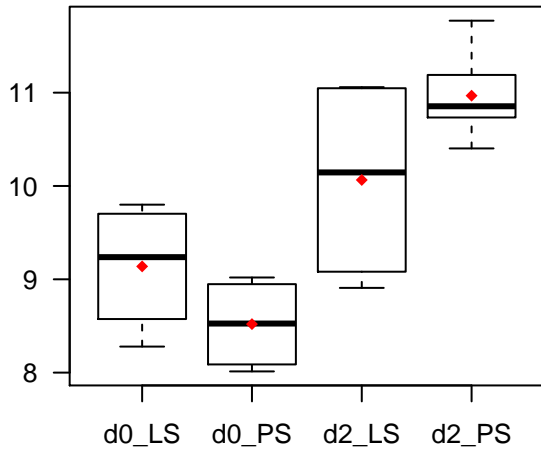

RNA-Seq

Log2 CPM

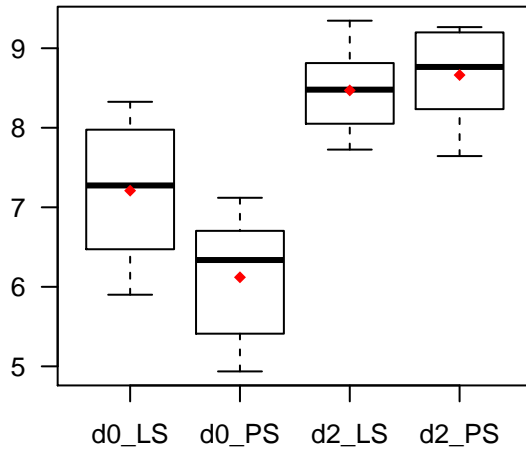

# ANO10

Microarray

Log2 normalized signal intensity

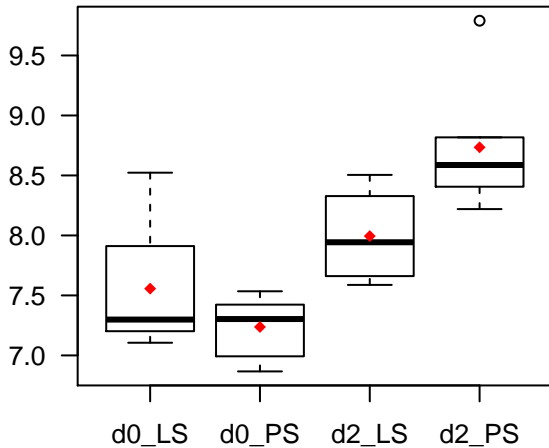

RNA-Seq

Log2 CPM

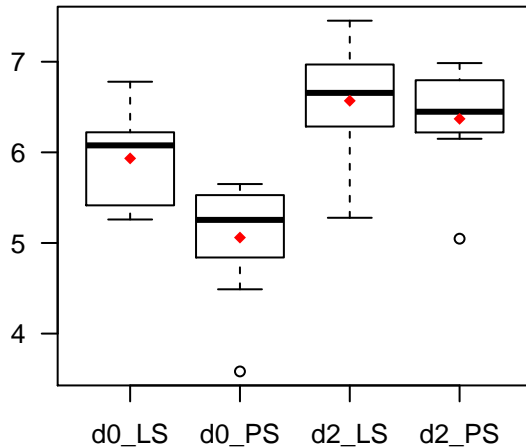

# ARG2

Microarray

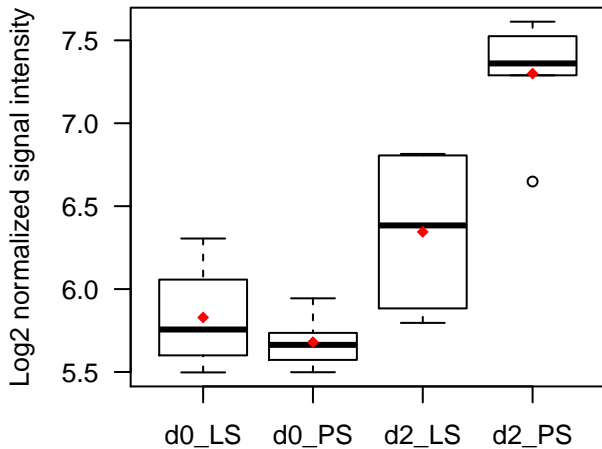

RNA-Seq

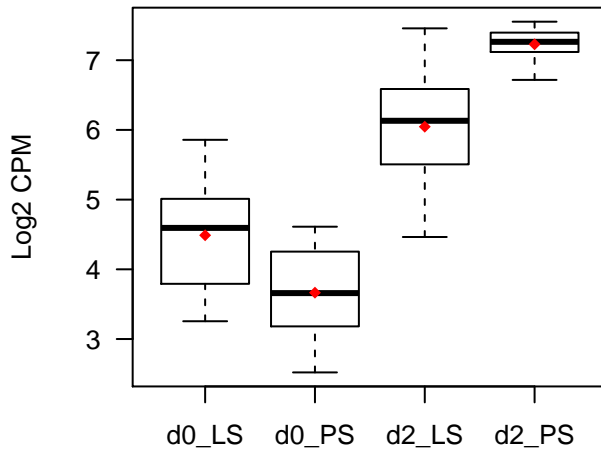

# TLR2

Microarray

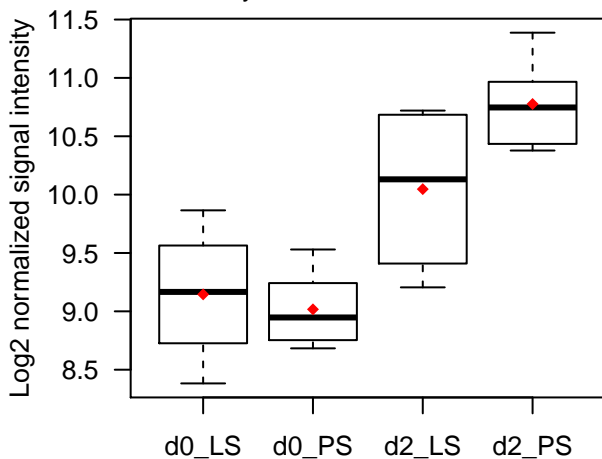

RNA-Seq

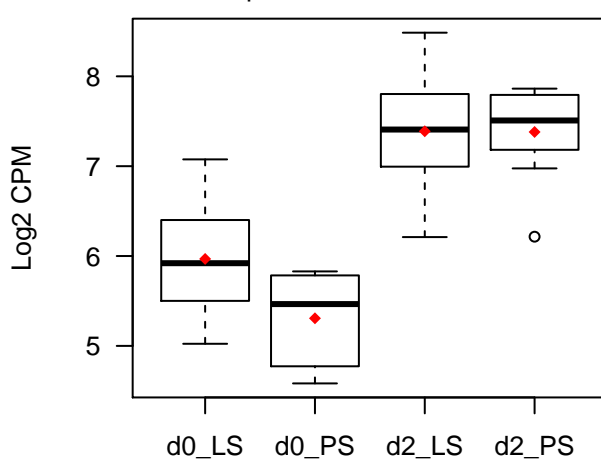

# TNFRSF1A

Microarray

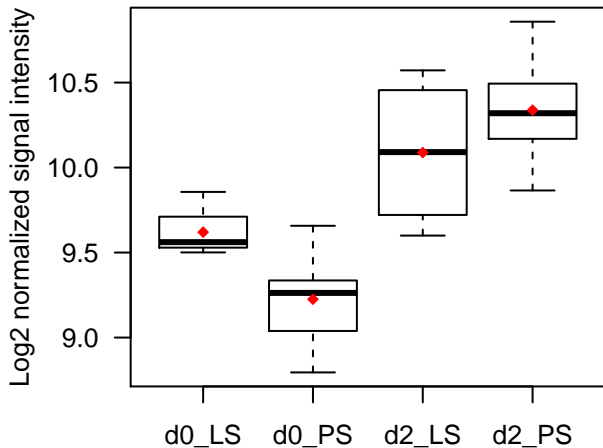

RNA-Seq

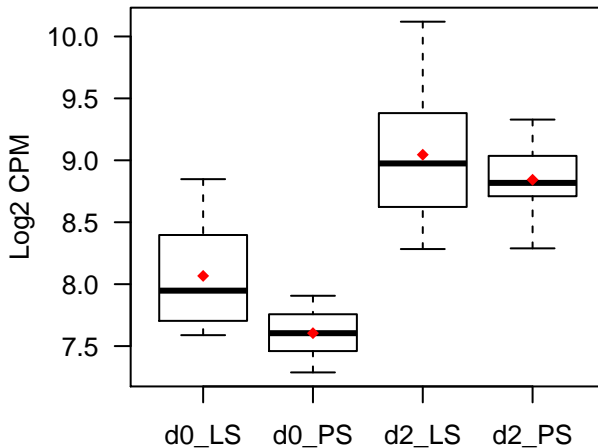

# ALOX5AP

Microarray

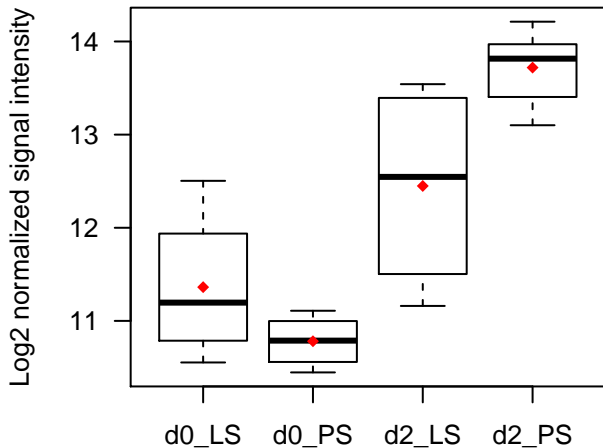

RNA-Seq



# LREAP1

Microarray

Log2 normalized signal intensity

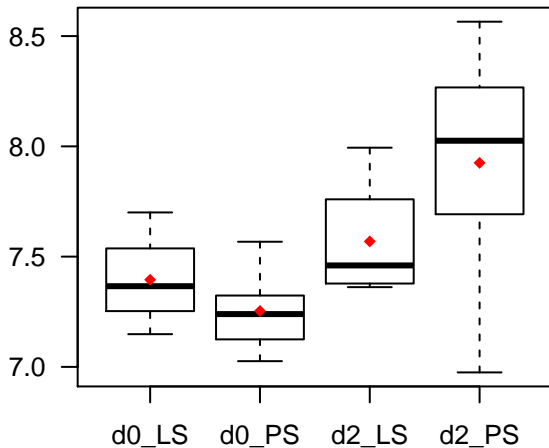

RNA-Seq

Log2 CPM

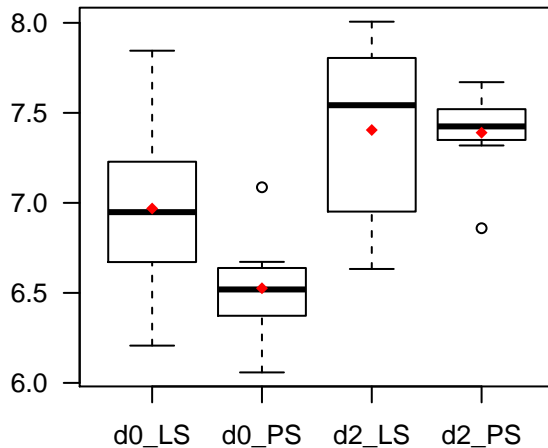

# BMX

Microarray

Log2 normalized signal intensity

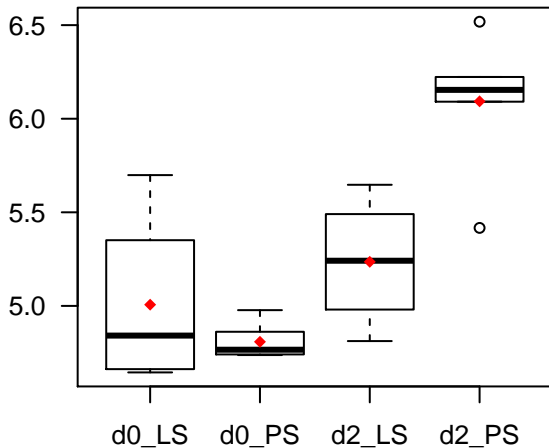

RNA-Seq

Log2 CPM

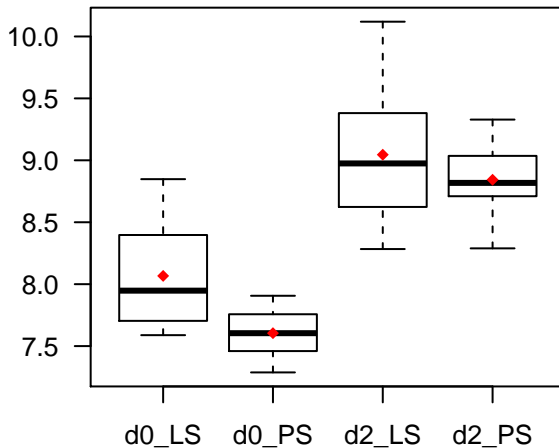

# ZCCHC6

Microarray

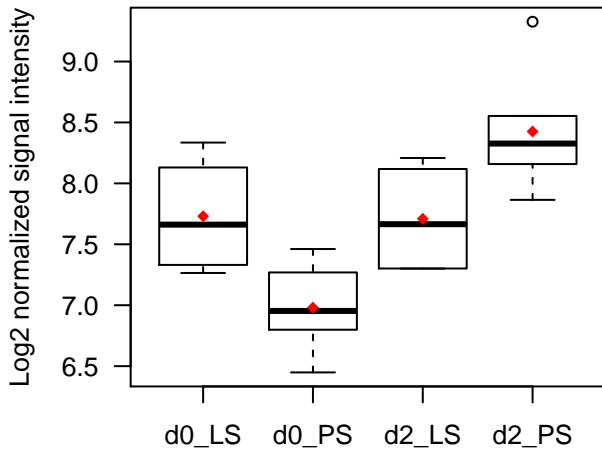

RNA-Seq

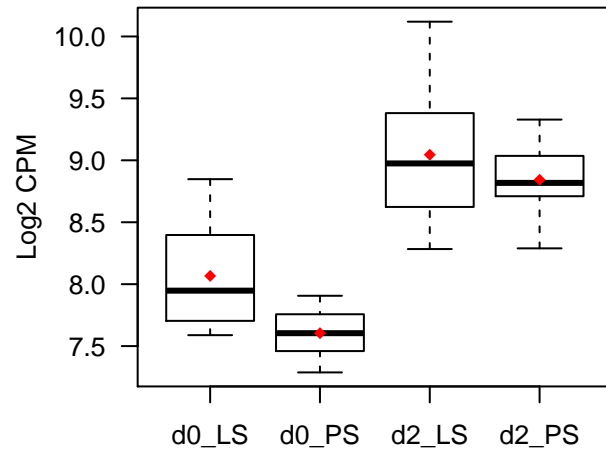

# PGK1

Microarray

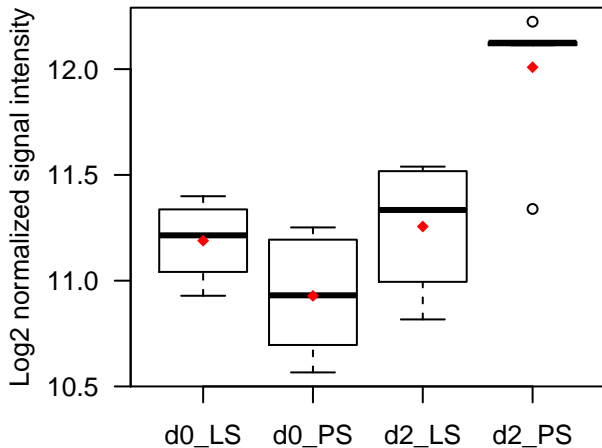

RNA-Seq

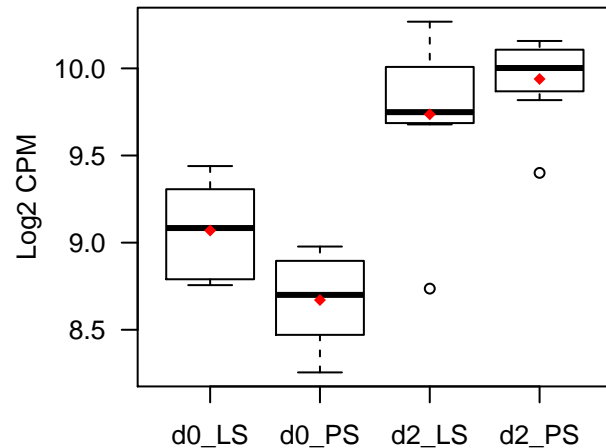

# CCR1

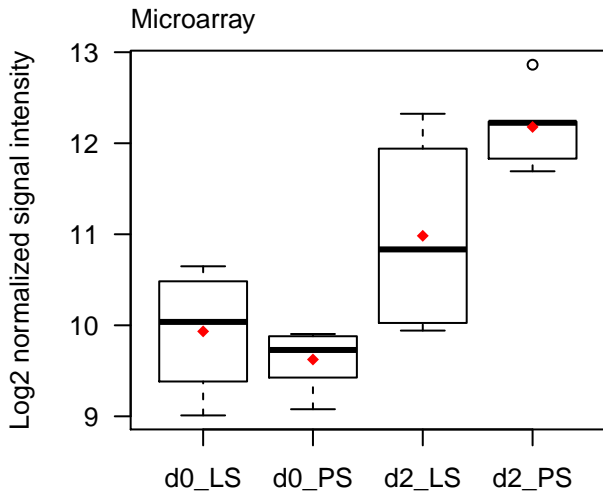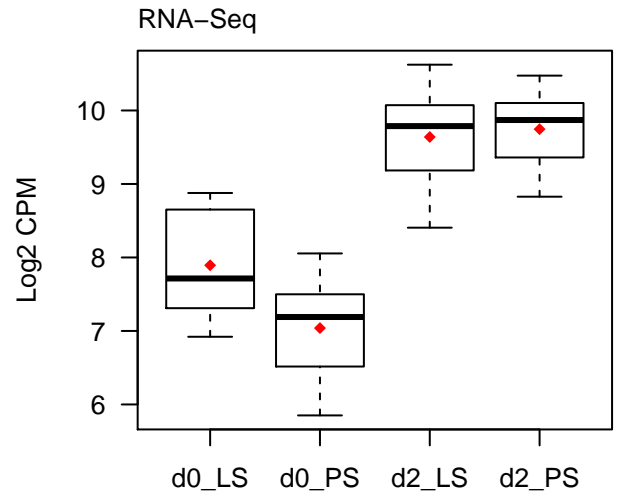

# NUMB

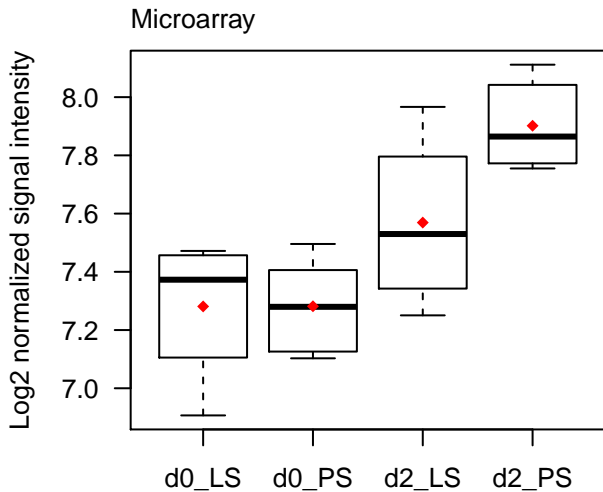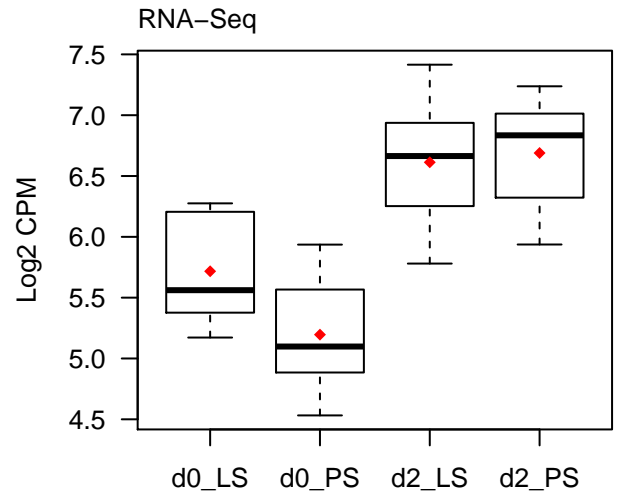

# SDCBP

Microarray

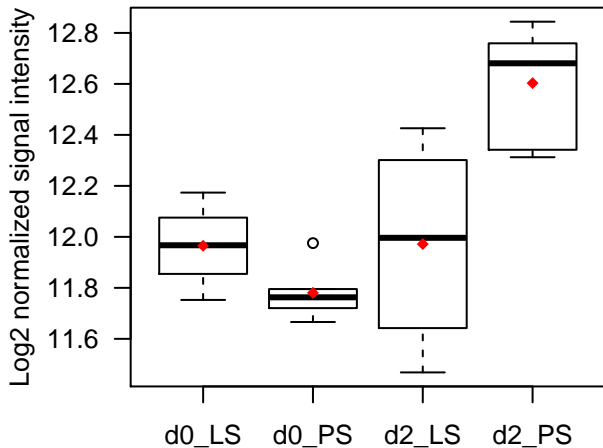

RNA-Seq

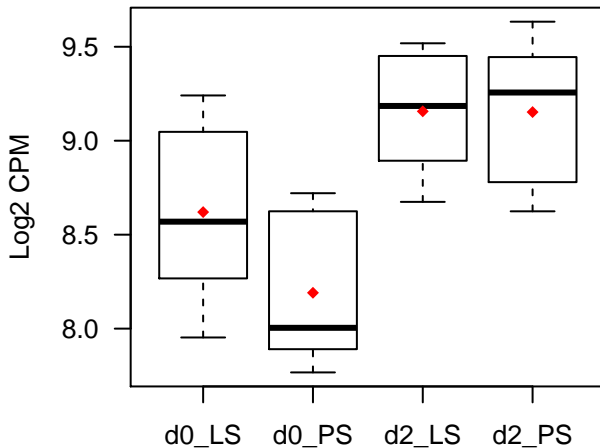

# SRGN

Microarray

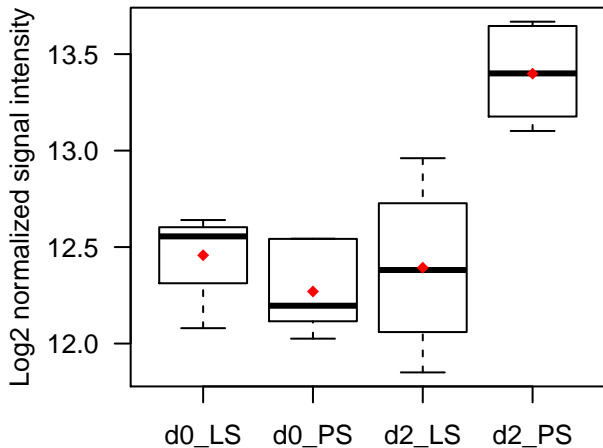

RNA-Seq

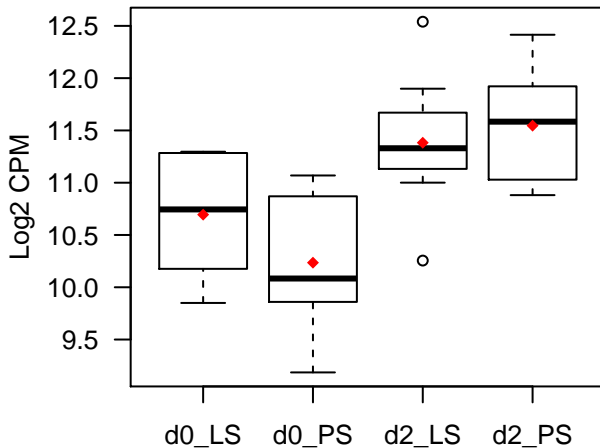



# GNG10

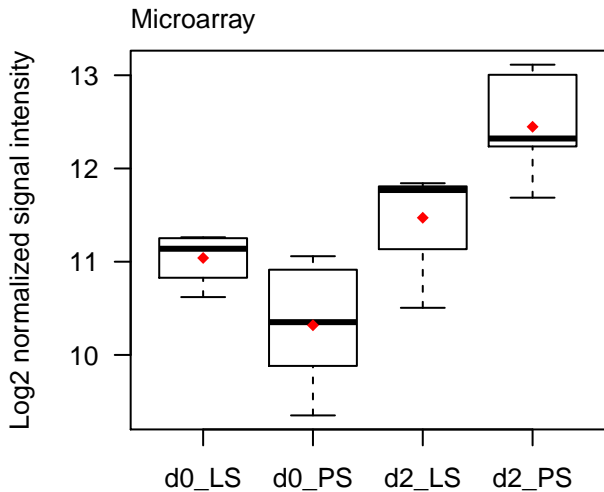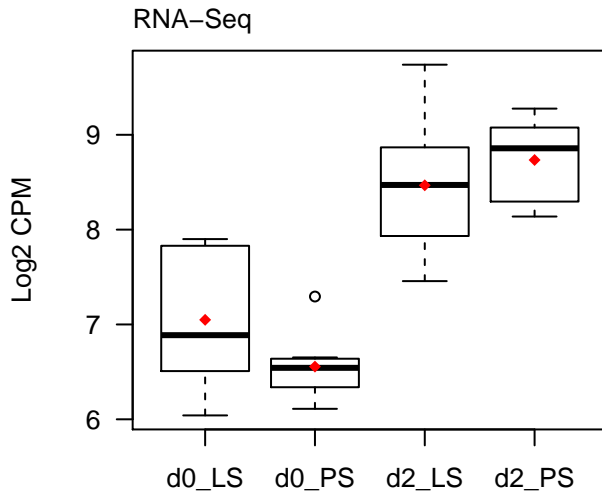

# LTB4R

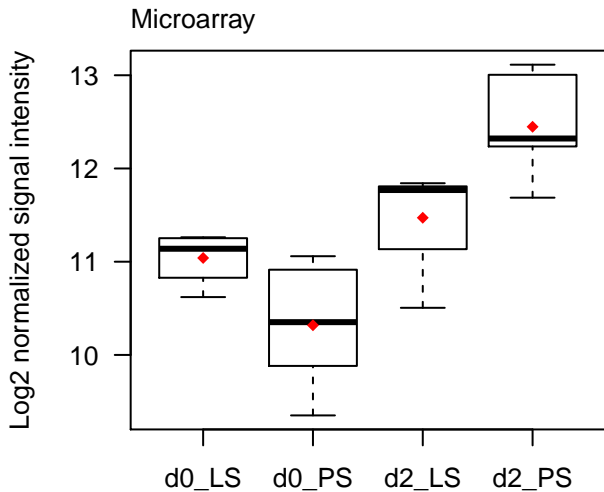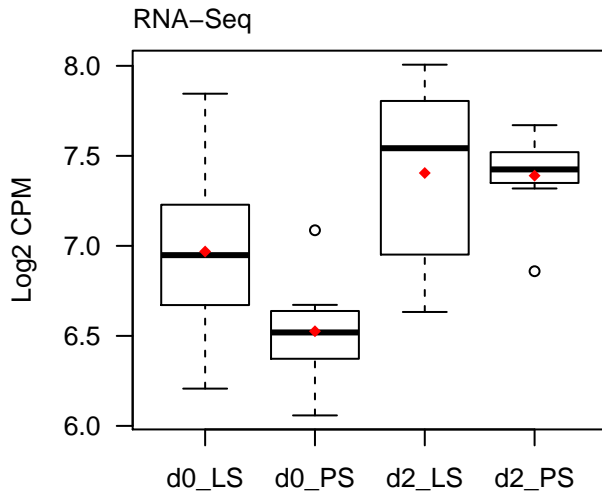

# RNF149

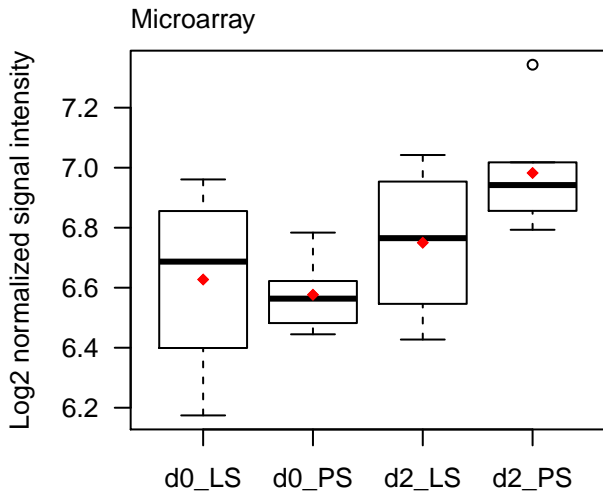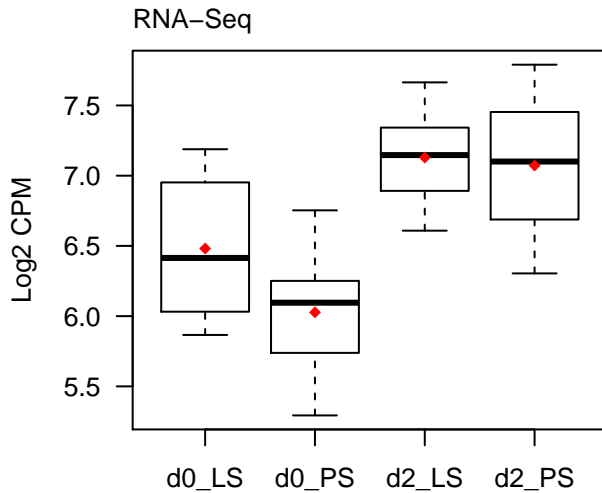

# SLC11A1

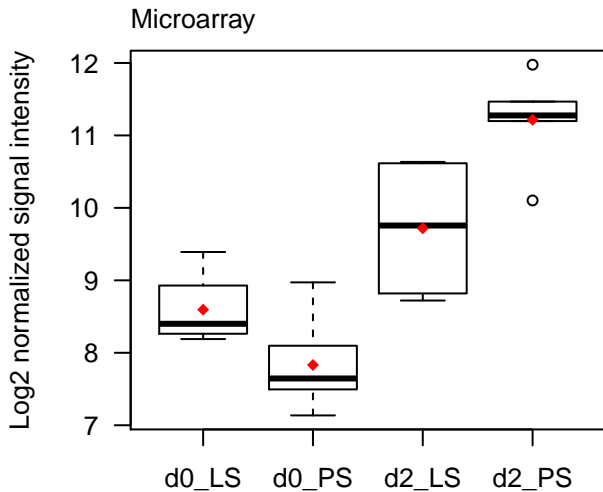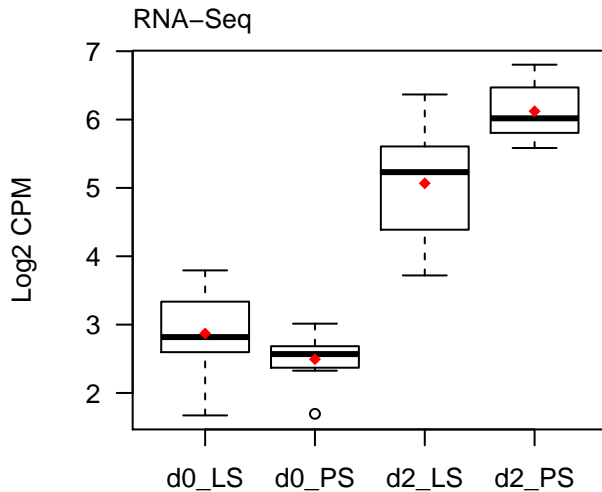

# TLR4

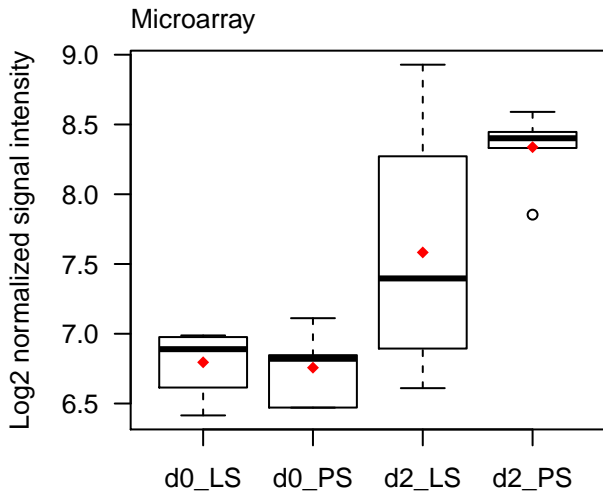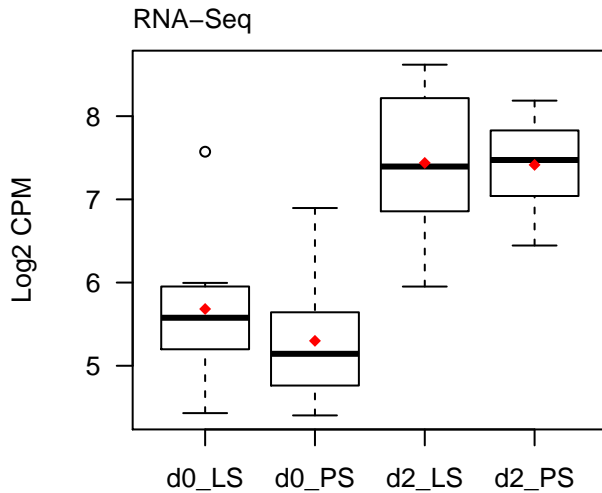

# CD14

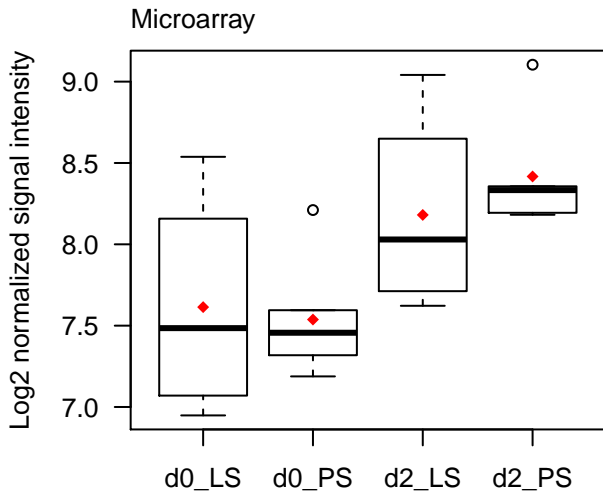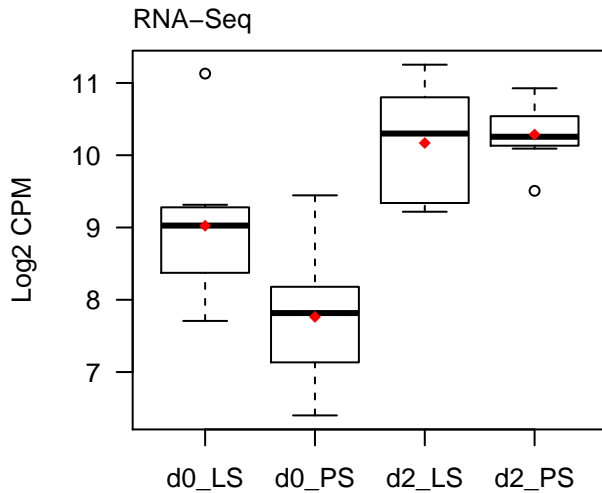

Supplement: 12864_2014_6126_MOESM10_ESM.pdf [file 12864_2014_6126_MOESM10_ESM.pdf]
