# Supplementary material for: Gene co-expression network analysis identifies porcine genes associated with variation in Salmonella shedding
Source: PubMed Central journal article supplement (PMC4070558; doi:10.1186/1471-2164-15-452), 2014-06-09

# Gene Ontology Biological Processes

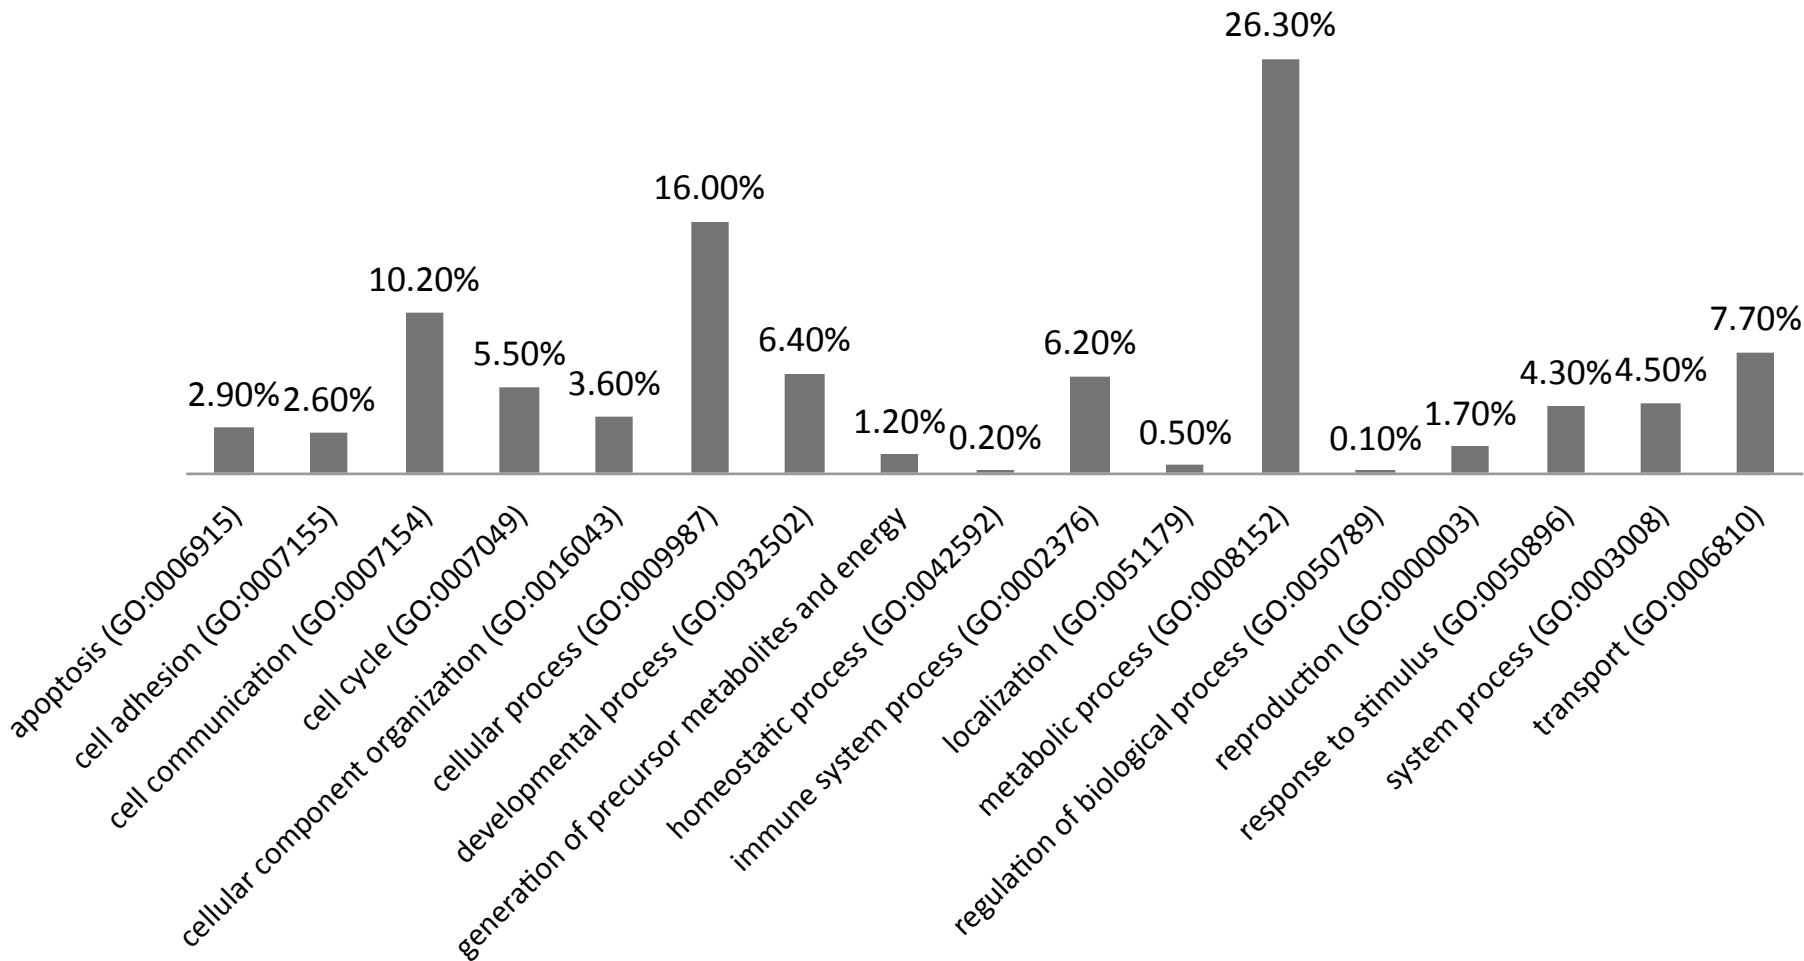

Supplement: 12864_2014_6126_MOESM4_ESM.pdf [file 12864_2014_6126_MOESM4_ESM.pdf]
